# Supplementary material for: An ultrasensitive ratiometric fluorescent thermometer based on frustrated static excimers in the physiological temperature range
Source: Royal Society of Chemistry journal article supplement (doi:10.1039/c9cc00614a), 2019-01-01
Supplement: c9cc00614a2.pdf [file c9cc00614a2.pdf]

## Supporting Information for

### An Ultrasensitive Ratiometric Fluorescent Thermometer Based on Frustrated Static Excimers in the Physiological Temperature range

Sen Liang,<sup>ab</sup> Yuan Wang,<sup>ab</sup> Xueke Wu,<sup>ab</sup> Min Chen,<sup>ab</sup> Lixuan Mu,<sup>\*a</sup> Guangwei She,<sup>a</sup> and Wensheng Shi<sup>\*ab</sup>

<sup>a</sup> Key Laboratory of Photochemical Conversion and Optoelectronic Materials, Technical Institute of Physics and Chemistry, Chinese Academy of Sciences, Beijing 100190, China.

<sup>b</sup> University of Chinese Academy of Sciences, Chinese Academy of Sciences, Beijing 100049, China.

#### EXPERIMENTAL SECTION

**Chemicals.** The following chemicals were used as received: Perylene-3, 4, 9, 10-tetracarboxylic dianhydride (PTCDA, 97%) and 2-ethyl-1-hexylamine (98%) were purchased from Sigma-Aldrich. Zinc acetate ( $\text{Zn}(\text{OAc})_2$ , 99.9%) and N, N'-Dimethylacetamide (DMAC, 99%) were purchased from Alfa. Methylcyclohexane (MCH,  $\geq 99.0\%$ ) and N, N'-di(2-methyl)-3,4,9,10-perylenetetracarboxylic diimide (DM-PDI,  $\geq 92.0\%$ ) were purchased from Aladdin. All aqueous solutions were prepared with ultrapure water ( $\geq 18 \text{ M}\Omega \text{ cm}$ ) and all the reagents were analytical grade.

**Apparatus and Characterizations.** The  $^1\text{H}$  NMR spectra were recorded on a Bruker Avance 400 MHz spectrometer (Bruker Co., Germany). The UV-vis absorption spectra were recorded with a Hitachi U-4100 spectrophotometer (Hitachi Co., Japan). Temperature-sensitive fluorescence spectra were recorded with a Hitachi F-4600 spectrophotometer (Hitachi Co., Japan) and a QNW TC1 temperature controller (Quantum Northwest, inc., USA).

**Synthesis of the DEH-PDI and its FSEs.** The DEH-PDI was synthesized according to the previous report.<sup>S1</sup> In a 500 mL round-bottomed flask, 4 g (10 mmol) PTCDA, 2.9 g (22 mmol) 2-ethyl-1-hexylamine and 0.5 g  $\text{Zn}(\text{OAc})_2$  in 150 mL DMAc were stirred at  $110^\circ\text{C}$  for 4 hours under argon atmosphere. Then 300 mL water was added and the resulting mixture was extracted with  $\text{CH}_2\text{Cl}_2$  three times. The organic layer was dried over anhydrous sodium sulfate and evaporated. The residue was purified by silica gel column chromatography ( $\text{CH}_2\text{Cl}_2$  as eluent) and then dried at  $120^\circ\text{C}$  to give the desired compound as red solid (6.1g, 93%). To fabricate the FSEs of DEH-PDI, the DEH-PDI was added into MCH to prepare the solution with various concentration ( $1.0 \times 10^{-5} \text{ M}$ ,  $2.0 \times 10^{-5} \text{ M}$ ,  $1.0 \times 10^{-4} \text{ M}$ ,  $1.8 \times 10^{-4} \text{ M}$ ,  $2.3 \times 10^{-4} \text{ M}$ ,  $2.7 \times 10^{-4} \text{ M}$ , and  $3.0 \times 10^{-4} \text{ M}$ ). After ultrasonic dissolving, the FSEs of DEH-PDI were prepared by vibrating its solutions in methylcyclohexane (MCH) at  $10^\circ\text{C}$  for 5h.

**Calculation of the molecular electron density distribution by DFT methods.** The molecular electron density distribution of DEH-PTCDI and DM-PDI was calculated by density functional theory (DFT) methods at the B3LYP/6-31G(d) level. It could be seen that both the HOMO and LUMO are localized on the polyaromatic core, and the side chains are not involved in the  $\pi$ -conjugation. Therefore, the two nitrogen atoms between PDI and the alkyl substitutions (2-ethylhexyl or methyl) are nodes in the  $\pi$ -orbital wave function. Therefore, the electron distribution of PDI would not be altered by adding the side chains.

**Thermochromism measurement.** The solution of DEH-PDI in MCH ( $C = 3 \times 10^{-4}$  M) was poured into three sample bottles. The first one was stored in a refrigerator ( $\sim 5^{\circ}\text{C}$ ). The second one was stored in warm water ( $\sim 30^{\circ}\text{C}$ ). The third one was stored in hot water ( $\sim 70^{\circ}\text{C}$ ). Ten minutes later, photographs of the three sample bottles were taken under visible light or 365 nm UV lamp. Then, all the solutions in sample bottles were poured into a test tube. After three cooling-heating cycles, the test tube was moved to a beaker with hot water. A video of the thermochromism performance in the test tube was taken.

**Preparation of the microthermometer.** Firstly, the micropipette was fabricated from the glass capillary (BF150-110-10) using a micropipette puller (P97, Sutter Instrument Co.). Pull parameters were heat=544, pull=0, vel=65, time=250 and pressure=500. The diameter of the tip of the micropipette is about 1.6  $\mu\text{m}$ . Secondly, after the solution of DEH-PDI in MCH ( $C=2 \times 10^{-4}$  M) was injected in the micropipette with a small syringe, the tip and end of the micropipette were sealed with epoxy.

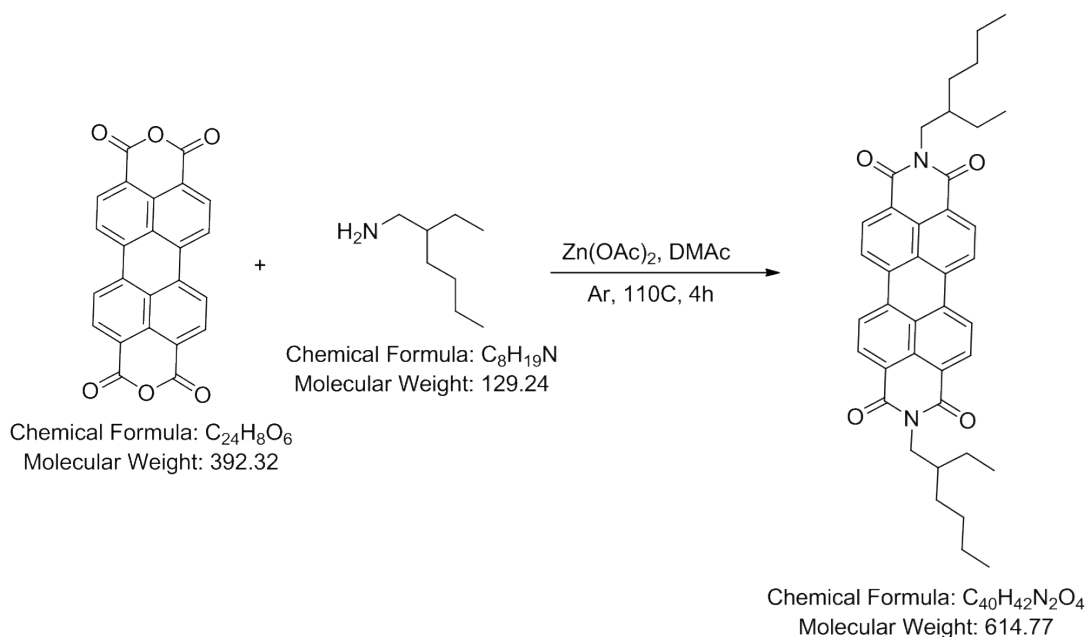

Figure S1. The synthesis of DEH-PDI.

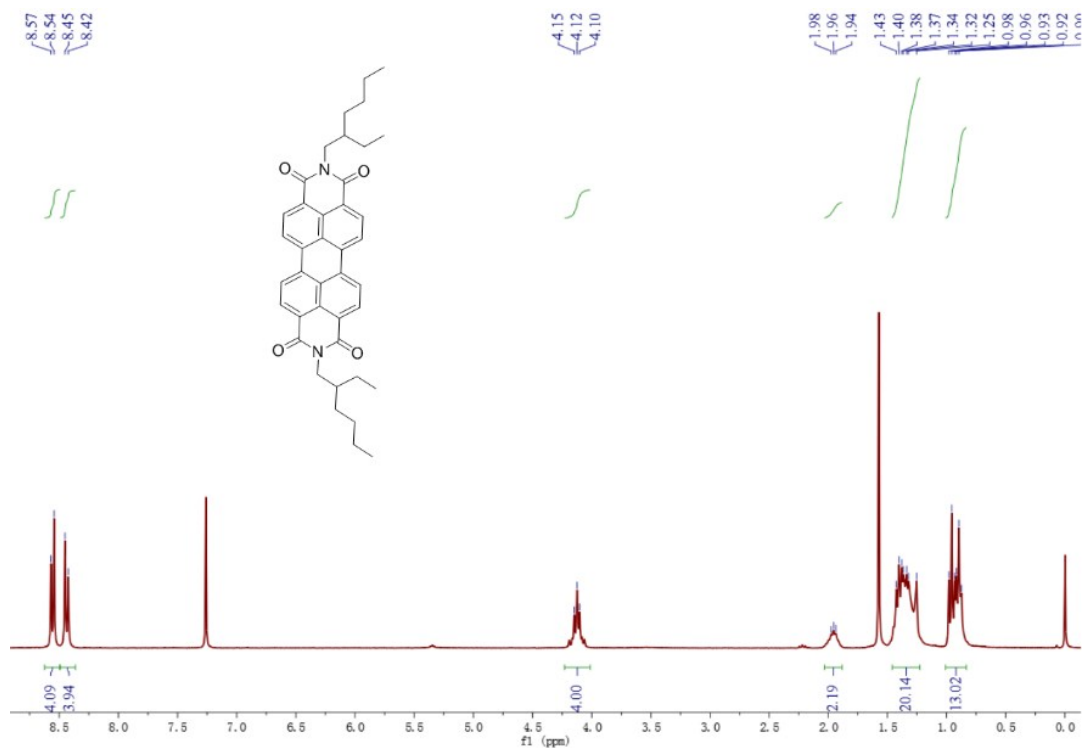

Figure S2. The <sup>1</sup>H NMR of DEH-PDI.

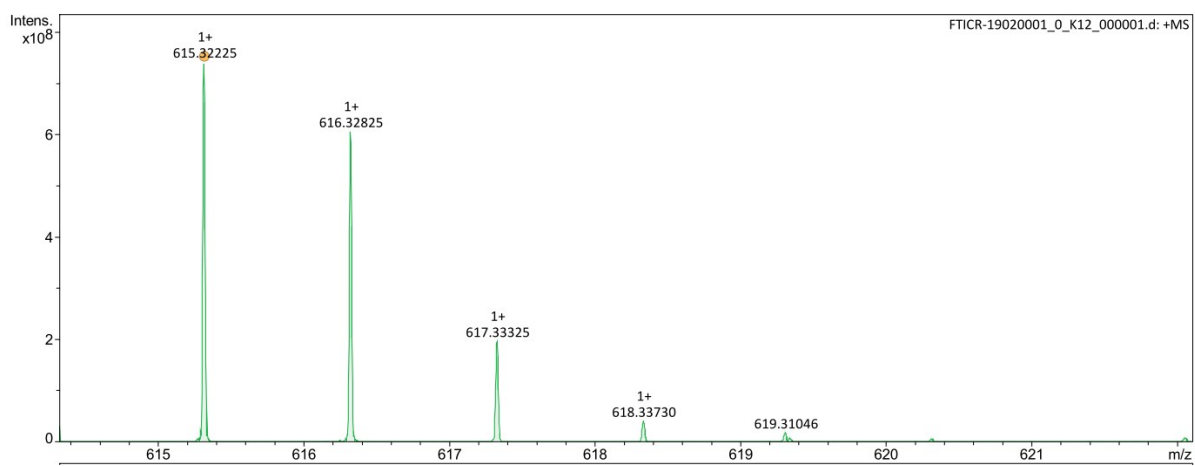

Figure S3. The MS of DEH-PDI.

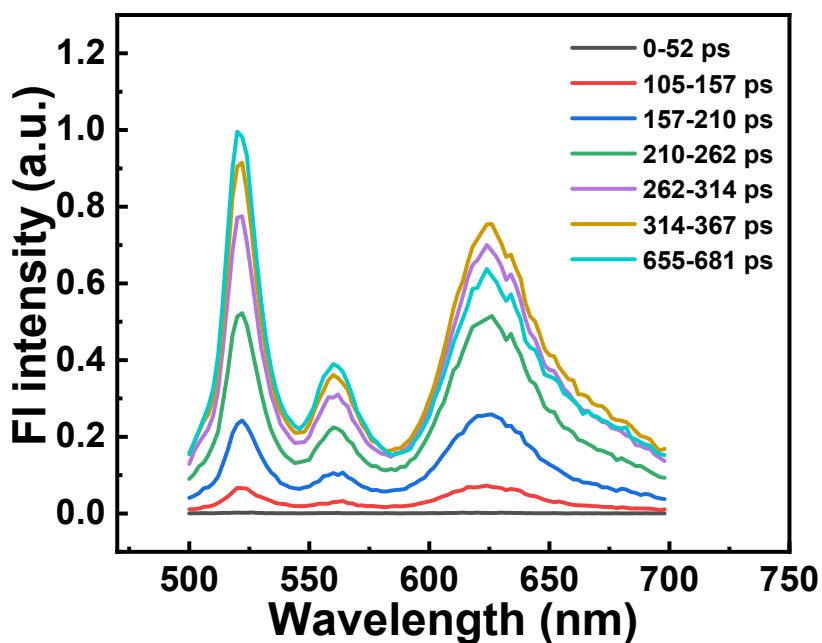

Figure S4. The time-resolved fluorescence spectra of DEH-PDI in MCH (excited at 405 nm,  $C=2\times 10^{-4}$  M).

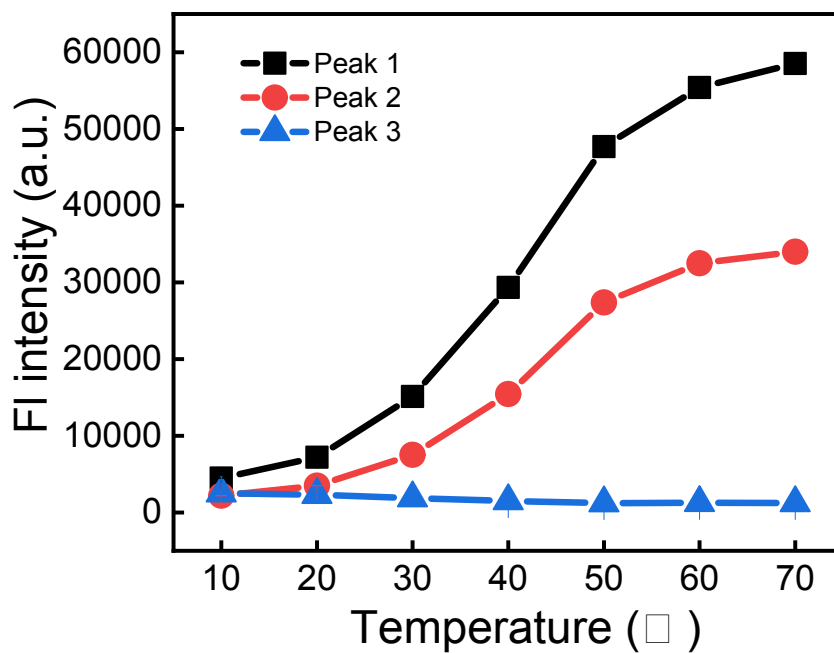

Figure S5. The fluorescence intensity of three emission peaks of DEH-PDI in MCH ( $C = 2\times 10^{-5}$  M, excited at 400 nm) changed with temperature.

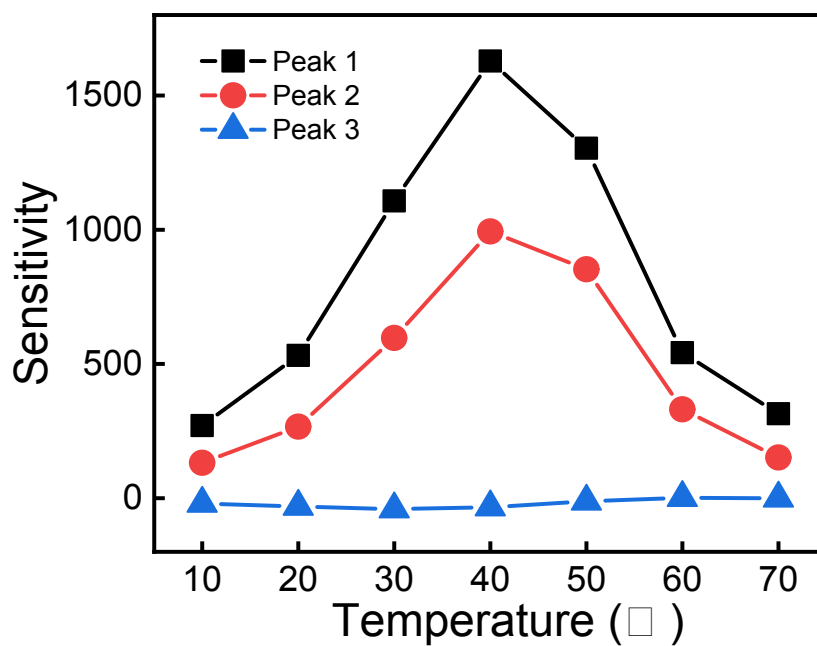

Figure S6. The sensitivities of fluorescence intensity of three emission peaks of DEH-PDI in MCH ( $C = 2 \times 10^{-5}$  M, excited at 400 nm).

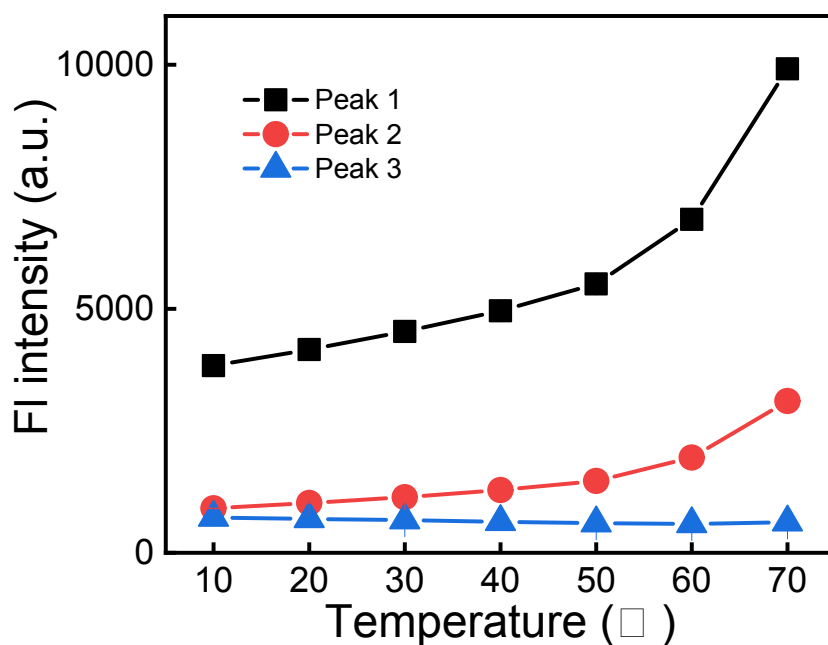

Figure S7. The fluorescence intensity of three emission peaks of DM-PDI in MCH ( $C = 2 \times 10^{-5}$  M, excited at 400 nm) changed with temperature.

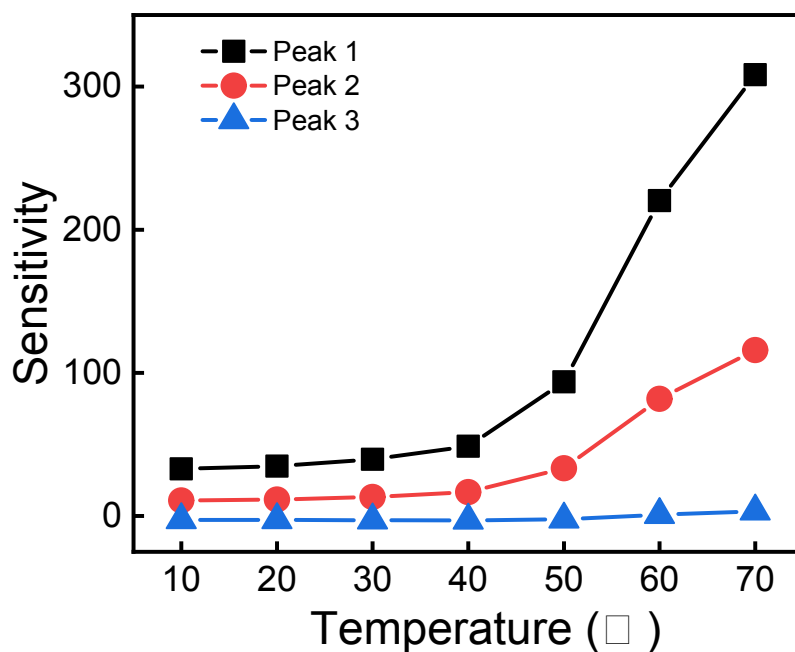

Figure S8. The sensitivities of fluorescence intensity of three emission peaks of DEH-PDI in MCH ( $C = 2 \times 10^{-5}$  M, excited at 400 nm).

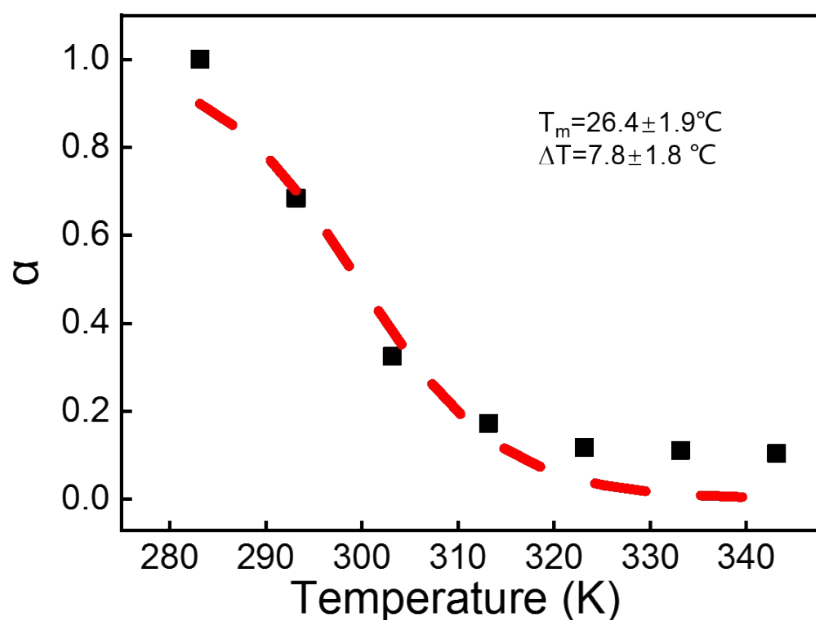

Figure S9. Normalized FSE/monomer ratio versus the temperature of DEH-PDI in MCH ( $C = 2 \times 10^{-5}$  M, excited at 400 nm) and the fitting of  $T_m$  of DEH-PDI FSE.

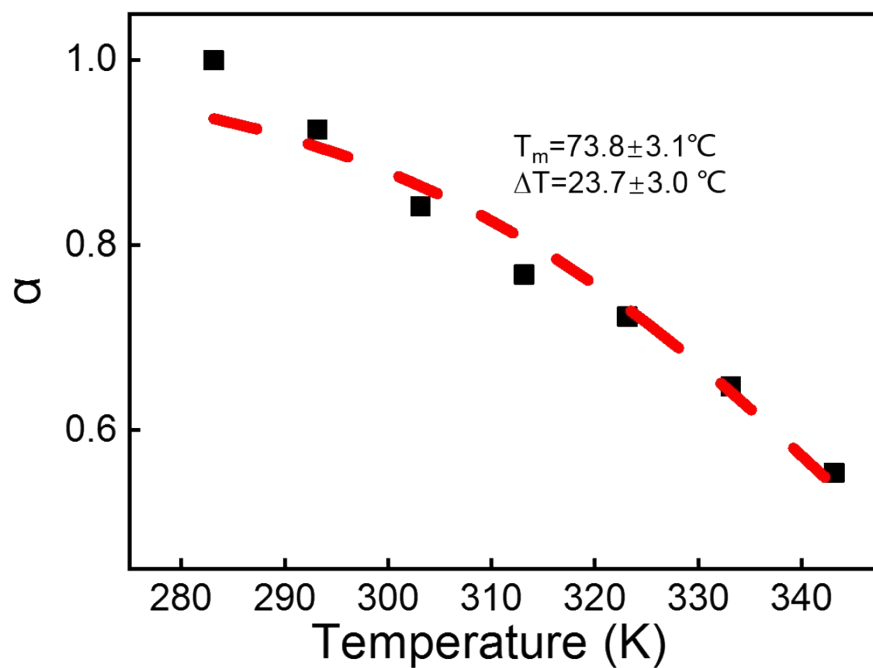

Figure S10. Normalized USE/monomer ratio versus the temperature of DM-PDI in MCH ( $C = 2 \times 10^{-5}$  M, excited at 400 nm) and the fitting of  $T_m$  of DM-PDI USE.

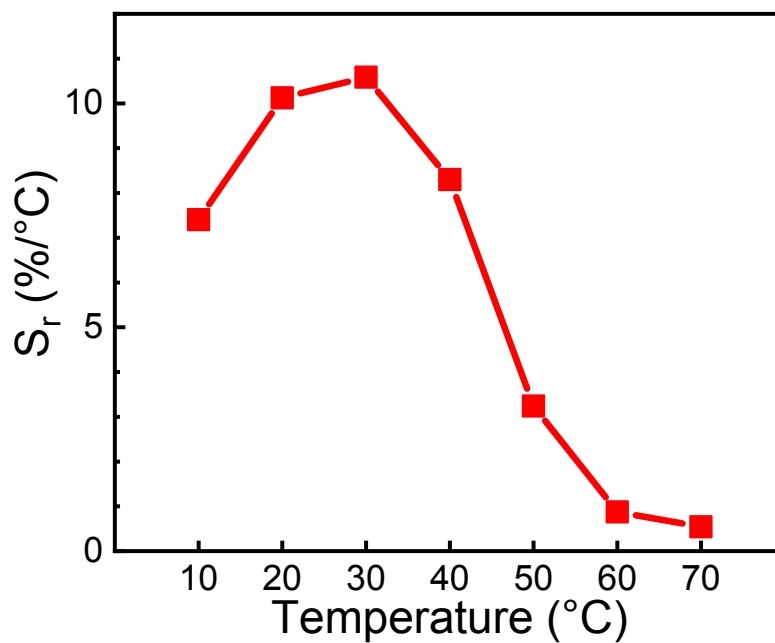

Figure S11. The relative sensitivities of the RFT based on DEH-PDI FSEs.

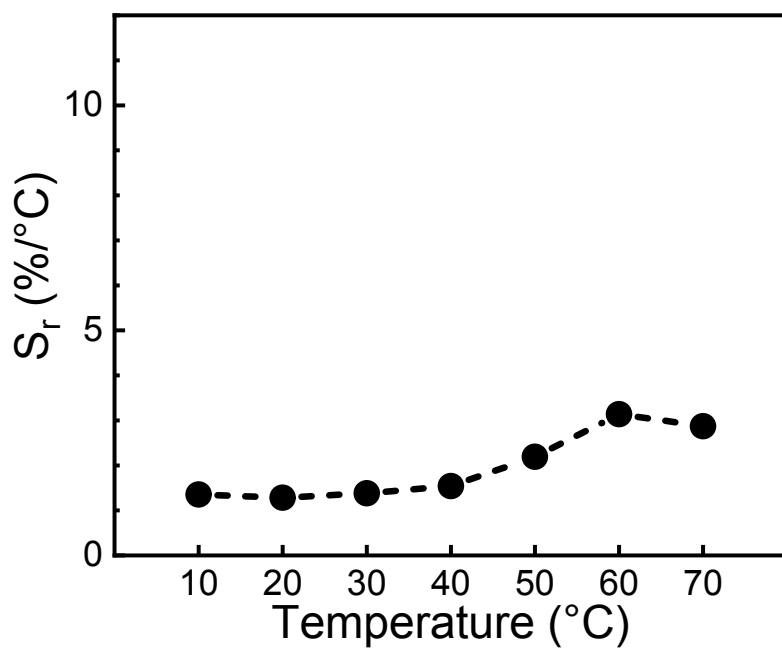

Figure S12. The relative sensitivities of the RFT based on DM-PDI USEs.

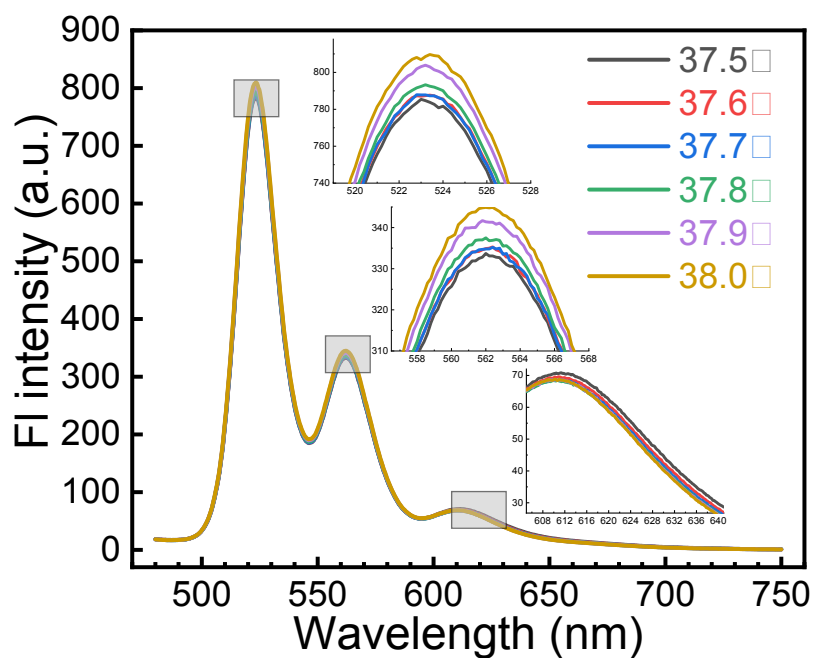

Figure S13. The fluorescence spectra of DEH-PDI in MCH ( $C = 2 \times 10^{-5}$  M, excited at 400 nm) in the temperature range of 37.5-38.0 °C.



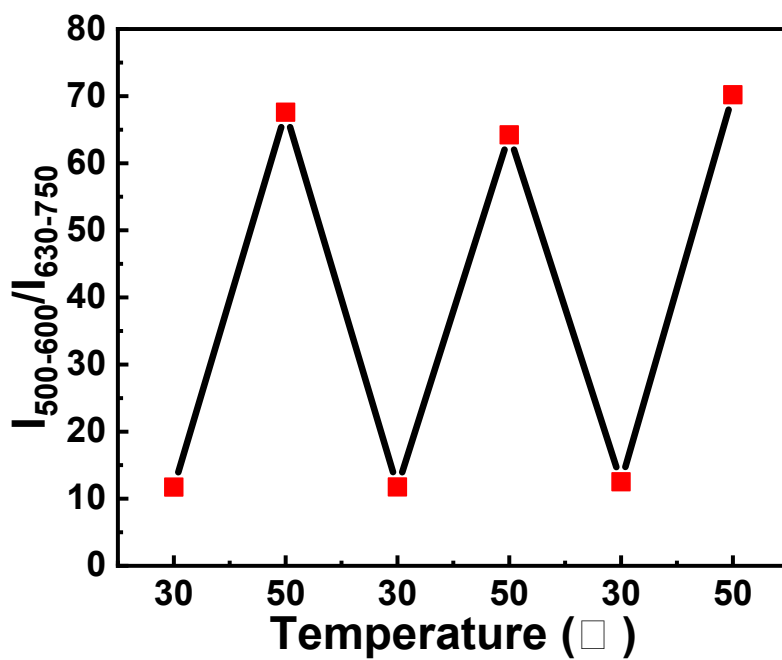

Figure S14. The reversibility test of the RFT based on DEH-PDI FSEs ( $C = 2 \times 10^{-5}$  M, excited at 400 nm).

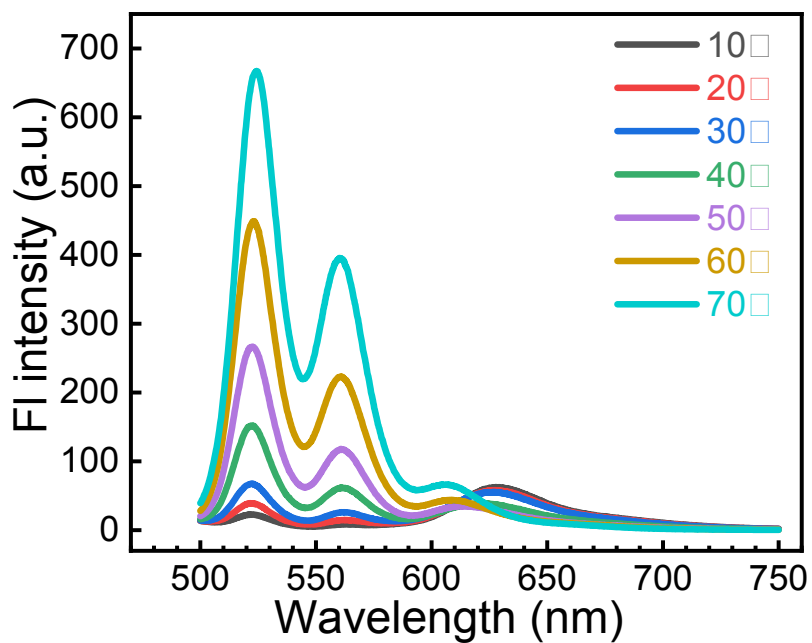

Figure S15. Fluorescence spectra of DEH-PDI in MCH ( $C = 3 \times 10^{-4}$  M, excited at 400 nm) at different temperatures ranging from 10.00°C to 70.00°C.

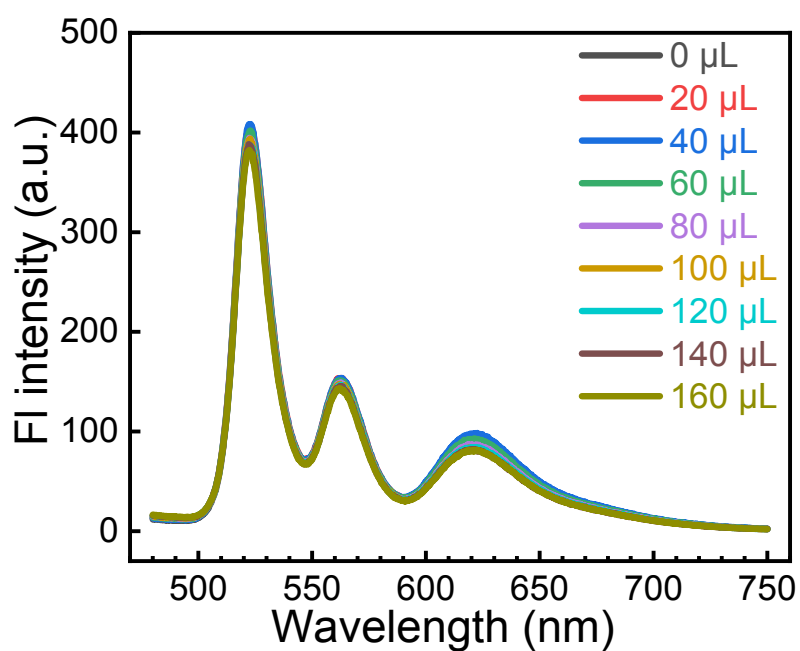

Figure S16. The influence of viscosity on the fluorescence spectra of RFT based on DEH-PDI FSEs in MCH (1mL,  $C = 3 \times 10^{-4}$  M, excited at 400 nm) by adding viscous Tween 80.

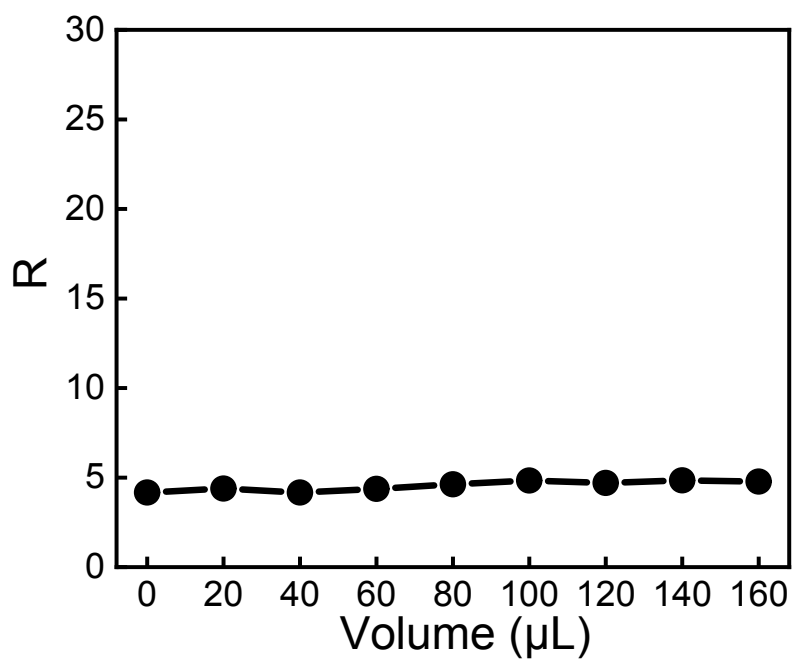

Figure S17. The influence of viscosity on the ratio values R of RFT based on DEH-PDI FSEs in MCH (1mL,  $C = 3 \times 10^{-4}$  M, excited at 400 nm) by adding viscous Tween 80.

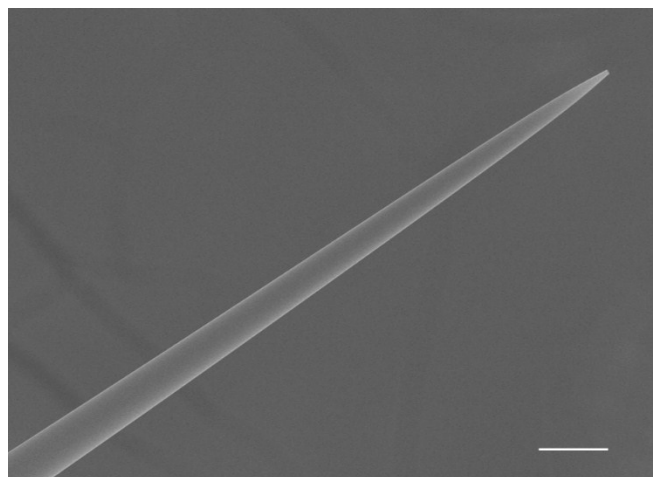

Figure S18. The scanning electron micrograph of the micropipette (scale bar is 20  $\mu\text{m}$ ).

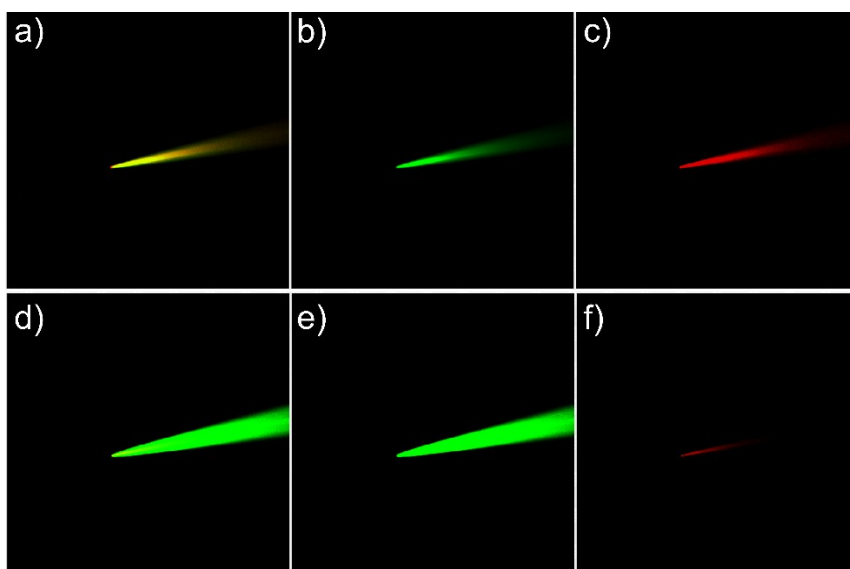

Figure S19. (a-c) Fluorescence images of the microthermometer in PBS buffer solution at 25°C: (a) merge emission (500-550 nm & 663-738 nm) (b) green emission (500-550 nm); (c) red emission (663-738 nm); (d-f) fluorescence images of the microthermometer in PBS buffer solution at 40°C: (d) merge emission (500-550 nm & 663-738 nm); (e) green emission (500-550 nm); (f) red emission (663-738 nm);  $\lambda_{\text{ex}}=405$  nm, 10 mM PBS buffer solution.

**Table S1** A comparison of the absolute sensitivity between our RFT and the reported ones

| Material                                                | Signal types              | Temperature sensing range (°C) | Absolute sensitivity (%/°C) | Ref.             |
|---------------------------------------------------------|---------------------------|--------------------------------|-----------------------------|------------------|
| ZnO:Er <sup>3+</sup> nanocrystals                       | Fluorescence ratio        | 10 – 180                       | 0.0062                      | [S2]             |
| Nanocrystals                                            | Fluorescence ratio        | 22 – 97                        | 0.83                        | [S3]             |
| Core-Shell nanocrystals                                 | Fluorescence ratio        | 20 – 50                        | 4.0                         | [S4]             |
| Triarylboron Compounds                                  | Fluorescence ratio        | -30 - +140                     | 1.1 – 5.9                   | [S5]             |
| N, N-dimethyl-4-((2-methylquinolin-6-yl)ethynyl)aniline | Fluorescence ratio        | 25 – 65                        | 3.75                        | [S6]             |
| PNIPAM                                                  | Fluorescence ratio        | 20 – 44                        | 30                          | [S7]             |
| Coumarin 545                                            | Fluorescence ratio        | 10 – 50                        | 0.025                       | [S8]             |
| Europium MOFs                                           | Fluorescence ratio        | 10 – 150                       | 1.37                        | [S9]             |
| Triarylphosphine oxide organic films                    | Fluorescence ratio        | -50 - +100                     | 1.2 - 2.4                   | [S10]            |
| <b>FSE</b>                                              | <b>Fluorescence ratio</b> | <b>10 - 70</b>                 | <b>46.85 - 249.7</b>        | <b>This work</b> |

**Table S2** A comparison of the relative sensitivity between our RFT and the reported fluorescent thermometers

| Material                                           | Signal types              | Temperature sensing range (°C) | Relative sensitivity (%/°C) | Ref.             |
|----------------------------------------------------|---------------------------|--------------------------------|-----------------------------|------------------|
| Perylene exciplex                                  | Fluorescence ratio        | 25 – 85                        | ~1                          | [S12]            |
| Semiconducting polymer dots                        | Fluorescence ratio        | 10 – 70                        | ~ 1                         | [S13]            |
| Quantum dot/quantum rod                            | Fluorescence ratio        | 20 – 40                        | ~ 2.4                       | [S14]            |
| Lanthanide silicate                                | Fluorescence ratio        | -261 - +177                    | 0.1 -2.0                    | [S15]            |
| MOF⊃dye                                            | Fluorescence ratio        | 20 – 80                        | maximally up to 1.28        | [S16]            |
| Lanthanide-doped self-assembled polymer monolayers | Fluorescence ratio        | 23 – 65                        | maximally up to 1.43        | [S17]            |
| Conjugated polyelectrolytes                        | Fluorescence ratio        | 20 -70                         | 0.99 - 2.06                 | [S18]            |
| Carbon dot                                         | Lifetime                  | 10 – 45                        | 1.79                        | [S19]            |
| Organoplatinum metallacycles                       | Fluorescence ratio        | -20 to 70                      | 0.76                        | [S20]            |
| Triplet sensitized upconversion                    | Fluorescence ratio        | 10 – 50                        | 0.8 - 7.1                   | [S21]            |
| <b>FSE</b>                                         | <b>Fluorescence ratio</b> | <b>10 - 70</b>                 | <b>3.240 - 10.58</b>        | <b>This work</b> |

**Table S3** A comparison of the precision between our RFT and the reported fluorescent thermometers

| <b>Material</b>                                    | <b>Signal types</b>                 | <b>Temperature sensing range (°C)</b> | <b>Precision (°C)</b> | <b>Ref.</b>      |
|----------------------------------------------------|-------------------------------------|---------------------------------------|-----------------------|------------------|
| Nanocrystals                                       | Fluorescence ratio                  | 22 – 97                               | 0.14                  | [S3]             |
| Perylene exciplex                                  | Fluorescence ratio                  | 25 – 85                               | 1                     | [S12]            |
| Quantum Dot/Quantum rod                            | Fluorescence ratio                  | 20 – 40                               | ≤ 0.2                 | [S14]            |
| Lanthanide-doped self-assembled polymer monolayers | Fluorescence ratio                  | 23 – 65                               | ≤ 0.3                 | [S17]            |
| Triplet sensitized upconversion                    | Fluorescence ratio                  | 10 – 50                               | 0.1                   | [S21]            |
| Nanogel                                            | Fluorescence intensity              | 25 – 42                               | 0.29 - 0.50           | [S22]            |
| Triarylboron                                       | Max emission wavelength             | -50 - +100                            | 1                     | [S23]            |
| Fluorescent polymer                                | Fluorescence lifetime               | 20 – 50                               | 0.18 - 0.58           | [S24]            |
| Gold nanoclusters                                  | Fluorescence lifetime and intensity | 15 – 45                               | 0.1 - 0.3             | [S25]            |
| Fluorescent nanogel                                | Fluorescence lifetime and intensity | 20 – 40                               | 0.02 – 0.84           | [S26]            |
| <b>FSE</b>                                         | <b>Fluorescence ratio</b>           | <b>10 - 70</b>                        | <b>0.04 - 0.06</b>    | <b>This work</b> |

## References.

- S1. S. Chen, Y. Liu, W. Qiu, X. Sun, Y. Ma and D. Zhu, *Chem Mater*, 2005, **17**, 2208-2215.
- S2. X. Wang, X. Kong, Y. Yu, Y. Sun and H. Zhang, *The Journal of Physical Chemistry C*, 2007, **111**, 15119-15124.
- S3. E. J. McLaurin, V. A. Vlaskin and D. R. Gamelin, *J Am Chem Soc*, 2011, **133**, 14978-14980.
- S4. C.-H. Hsia, A. Wuttig and H. Yang, *ACS Nano*, 2011, **5**, 9511-9522.
- S5. J. Feng, L. Xiong, S. Q. Wang, S. Y. Li, Y. Li and G. Q. Yang, *Adv Funct Mater*, 2013, **23**, 340-345.
- S6. C. Cao, X. Liu, Q. Qiao, M. Zhao, W. Yin, D. Mao, H. Zhang and Z. Xu, *Chem Commun*, 2014, **50**, 15811-15814.
- S7. X. Hu, Y. Li, T. Liu, G. Zhang and S. Liu, *ACS Applied Materials & Interfaces*, 2015, **7**, 15551-15560.
- S8. D. Mao, X. Liu, Q. Qiao, W. Yin, M. Zhao, J. M. Cole, J. Cui and Z. Xu, *Analyst*, 2015, **140**, 1008-1013.
- S9. D. Wang, Q. Tan, J. Liu and Z. Liu, *Dalton Transactions*, 2016, **45**, 18450-18454.
- S10. Q. Fang, J. Li, S. Li, R. Duan, S. Wang, Y. Yi, X. Guo, Y. Qian, W. Huang and G. Yang, *Chem Commun*, 2017, **53**, 5702-5705.
- S11. Q. Fang, Y. Li, Y. Wang, F. Yao, S. Wang, Y. Qian, G. Yang and W. Huang, *Journal of Materials Chemistry C*, 2018, **6**, 8115-8121.
- S12. N. Chandrasekharan and L. A. Kelly, *J Am Chem Soc*, 2001, **123**, 9898-9899.
- S13. F. Ye, C. Wu, Y. Jin, Y.-H. Chan, X. Zhang and D. T. Chiu, *J Am Chem Soc*, 2011, **133**, 8146-8149.
- S14. A. E. Albers, E. M. Chan, P. M. McBride, C. M. Ajo-Franklin, B. E. Cohen and B. A. Helms, *J Am Chem Soc*, 2012, **134**, 9565-9568.
- S15. D. Ananias, F. A. A. Paz, D. S. Yufit, L. D. Carlos and J. Rocha, *J Am Chem Soc*, 2015, **137**, 3051-3058.
- S16. Y. J. Cui, R. J. Song, J. C. Yu, M. Liu, Z. Q. Wang, C. D. Wu, Y. Yang, Z. Y. Wang, B. L. Chen and G. D. Qian, *Adv Mater*, 2015, **27**, 1420-1425.
- S17. M. Rodrigues, R. Pinol, G. Antorrena, C. D. S. Brites, N. J. O. Silva, J. L. Murillo, R. Cases, I. Diez, F. Palacio, N. Torras, J. A. Plaza, L. Perez-Garcia, L. D. Carlos and A. Millan, *Adv Funct Mater*, 2016, **26**, 200-209.
- S18. G. H. Darwish, A. Koubeissi, T. Shoker, S. Abou Shaheen and P. Karam, *Chem Commun*, 2016, **52**, 823-826.
- S19. S. Kalytchuk, K. Poláková, Y. Wang, J. P. Froning, K. Cepe, A. L. Rogach and R. Zbořil, *ACS Nano*, 2017, **11**, 1432-1442.
- S20. J.-H. Tang, Y. Sun, Z.-L. Gong, Z.-Y. Li, Z. Zhou, H. Wang, X. Li, M. L. Saha, Y.-W. Zhong and P. J. Stang, *J Am Chem Soc*, 2018, **140**, 7723-7729.
- S21. M. Xu, X. M. Zou, Q. Q. Su, W. Yuan, C. Cao, Q. H. Wang, X. J. Zhu, W. Feng and F. Y. Li, *Nature Communications*, 2018, **9**, 7.
- S22. C. Gota, K. Okabe, T. Funatsu, Y. Harada and S. Uchiyama, *J Am Chem Soc*, 2009, **131**, 2766-2767.
- S23. J. Feng, K. J. Tian, D. H. Hu, S. Q. Wang, S. Y. Li, Y. Zeng, Y. Li and G. Q. Yang, *Angew Chem Int Edit*, 2011, **50**, 8072-8076.

- S24. K. Okabe, N. Inada, C. Gota, Y. Harada, T. Funatsu and S. Uchiyama, *Nature Communications*, 2012, **3**, 705.
- S25. L. Shang, F. Stockmar, N. Azadfar and G. U. Nienhaus, *Angew Chem Int Edit*, 2013, **52**, 11154-11157.
- S26. S. Uchiyama, T. Tsuji, K. Kawamoto, K. Okano, E. Fukatsu, T. Noro, K. Ikado, S. Yamada, Y. Shibata, T. Hayashi, N. Inada, M. Kato, H. Koizumi and H. Tokuyama, *Angew Chem Int Edit*, 2018, **57**, 5413-5417.
